# Supplementary material
Source: publisher figshare collection journal article supplement (https://future-science-group.figshare.com/ndownloader/files/28913532)
Supplement: Supplementary file 1 [file 28913532]

Supplementary Tables:

Supplementary Table S1. Median Survival of Esophagus Cancer Patients Stratified by Chemotherapy

Supplementary Table S2. Median Survival of Esophagus Cancer Patients Stratified by Histological Types in Postoperative Radiotherapy Subgroup before Propensity Score Matching

Supplementary Table S3. Median Survival of Esophagus Cancer Patients Stratified by Histological Types in Postoperative Radiotherapy Subgroup after Propensity Score Matching

**Table S1. Median Survival of Esophagus Cancer Patients Stratified by Chemotherapy**

| **Chem** | **Median Survival. mo. (IQR)** | | | | | |
| --- | --- | --- | --- | --- | --- | --- |
| **Before PSM** | | | **After PSM** | | |
| **All** | **AC** | **SCC** | **All** | **AC** | **SCC** |
| No | 19 (7-52) | 21 (9-56) | 17 (7-52) | 16 (7-39) | 19 (9-39) | 15 (6-36) |
| Yes | 41 (18-NA) | 41 (19-NA) | 38 (13-NA) | 36 (17-77) | 36 (21-75) | 35 (11-90) |
| All | 33 (14-113) | 35 (16-113) | 27 (10-104) | 24 (11-73) | 26 (12-73) | 18 (7-90) |

Abbreviation: mo., months; IQR, interquartile range; PSM, propensity score matching; No, patients without chemotherapy or unknown; Yes, patients with chemotherapy; AC, Adenocarcinoma; SCC, squamous cell carcinoma; NA, not reached.

**Table S2. Median Survival of Esophagus Cancer Patients Stratified by Histological Types in Postoperative Radiotherapy Subgroup before Propensity Score Matching**

| **Chem** | **Median Survival. mo. (IQR)** | | | | | |
| --- | --- | --- | --- | --- | --- | --- |
| **All** | | **AC** | | **SCC** | |
| **PORT** | | **PORT** | | **PORT** | |
| **No** | **Yes** | **No** | **Yes** | **No** | **Yes** |
| Noa | 20 (6-56) | 15 (9-23) | 20 (6-48) | 20 (14-23) | 17 (7-57) | 15 (9-31) |
| Yes | 41 (17-86) | 33 (18-114) | 47 (23-81) | 47 (24-NA) | 35 (12-90) | 23 (12-56) |
| All | 24 (9-73) | 27 (15-75) | 25 (11-75) | 33 (20-NA) | 19 (8-62) | 19 (11-47) |

Abbreviation: mo., months; IQR, interquartile range; Chem, chemotherapy; AC, Adenocarcinoma; SCC, squamous cell carcinoma; NA, not reached.

a Patients without chemotherapy or unknown.

**Table S3. Median Survival of Esophagus Cancer Patients Stratified by Histological Types in Postoperative Radiotherapy Subgroup after Propensity Score Matching**

| **Chem** | **Median Survival. mo. (IQR)** | | | | | |
| --- | --- | --- | --- | --- | --- | --- |
| **All** | | **AC** | | **SCC** | |
| **PORT** | | **PORT** | | **PORT** | |
| **No** | **Yes** | **No** | **Yes** | **No** | **Yes** |
| Noa | 16 (4-53) | 14 (9-18) | 16 (5-39) | 14 (12-20) | 16 (2-53) | 9 (8-15) |
| Yes | 38 (14-77) | 34 (20-85) | 41 (23-75) | 85 (20-NA) | 35 (12-90) | 23 (11-56) |
| All | 26 (9-73) | 15 (11-34) | 30 (11-72) | 20 (14-85) | 17 (7-90) | 15 (8-34) |

Abbreviation: mo., months; IQR, interquartile range; Chem, chemotherapy; AC, Adenocarcinoma; SCC, squamous cell carcinoma.

a Patients without chemotherapy or unknown.
